# Supplementary material for: Long non-coding RNAs in ovarian granulosa cells
Source: J Ovarian Res. 2020 Jun 5;13:63. doi: 10.1186/s13048-020-00663-2 (PMC7275442; doi:10.1186/s13048-020-00663-2)
Supplement: Supplementary file 1 — Additional file 1. The fourteen overlapping lncRNAs that are transcribed from chromosome 2 and enhancer-like lncRNAs that were differently expressed in PCOS GCs. [file 13048_2020_663_MOESM1_ESM.xlsx]

## Sheet: Sheet1
Supplementary table 1. Fourteen overlapping differentially expressed lncRNAs between lncRNAs that are transcribed from chromosome 2 and enhancer-like lncRNAs
ENST00000442831
ENST00000432125
ENST00000450294
ENST00000449673
ENST00000456255
ENST00000424342
ENST00000432431
ENST00000435291
ENST00000446593
ENST00000424342
ENST00000421581
ENST00000433673
ENST00000442864
ENST00000495639
